# Supplementary material for: Neoadjuvant Chemotherapy or Endocrine Therapy for Invasive Ductal Carcinoma of the Breast With High Hormone Receptor Positivity and Human Epidermal Growth Factor Receptor 2 Negativity
Source: PubMed Central journal article supplement (PMC7955271; doi:10.1001/jamanetworkopen.2021.1785), 2021-03-12
Supplement: jamanetwopen-e211785-s001.pdf [file jamanetwopen-e211785-s001.pdf]

## Supplemental Online Content

Zhang J, Lu CY, Chen HM, Wu SY. Neoadjuvant chemotherapy or endocrine therapy for invasive ductal carcinoma of the breast with high hormone receptor positivity and human epidermal growth factor receptor 2 negativity. *JAMA Netw Open*. 2021;4(3):e211785. doi:10.1001/jamanetworkopen.2021.1785

**eTable.** Outcomes of Patients With Strongly Hormone Receptor–Positive and Human Epidermal Growth Factor Receptor 2–Negative Invasive Ductal Carcinoma Receiving Neoadjuvant Treatments After Propensity Score Matching

This supplemental material has been provided by the authors to give readers additional information about their work.

**eTable. Outcomes of Patients With Strongly Hormone Receptor–Positive and Human Epidermal Growth Factor Receptor 2–Negative Invasive Ductal Carcinoma Receiving Neoadjuvant Treatments After Propensity Score Matching**

|                       |             | NACT<br>N = 495 |        | NET<br>N = 145 |        |                      |
|-----------------------|-------------|-----------------|--------|----------------|--------|----------------------|
| Variable              |             | n               | (%)    | n              | (%)    | <i>P</i> value       |
| Pathologic response   | pCR         | 67              | (12.5) | 9              | (6.2)  | <0.0001 <sup>#</sup> |
|                       | Downstaging | 172             | (34.7) | 29             | (20.0) |                      |
|                       | Equal stage | 146             | (29.5) | 59             | (40.7) |                      |
|                       | Upstaging   | 110             | (22.2) | 48             | (33.1) |                      |
| Pathologic AJCC stage | ypT0N0      | 67              | (12.5) | 9              | (6.2)  | <0.0001 <sup>#</sup> |
|                       | I           | 85              | (17.2) | 10             | (6.9)  |                      |
|                       | II          | 219             | (44.2) | 76             | (52.4) |                      |
|                       | III         | 124             | (25.1) | 50             | (34.5) |                      |
| Surgical type         | BCS         | 198             | (40.0) | 55             | (37.9) | 0.9953 <sup>#</sup>  |
|                       | TM          | 297             | (60.0) | 90             | (62.1) |                      |
| Nodal surgery         | ALND        | 407             | (82.2) | 118            | (81.4) | 0.6530 <sup>#</sup>  |
|                       | SLNB        | 88              | (17.8) | 27             | (18.6) |                      |
| Adjuvant RT           |             | 384             | (77.6) | 99             | (68.3) | 0.0536 <sup>#</sup>  |
| Death                 |             | 71              | (14.3) | 38             | (26.2) | 0.0025 <sup>#</sup>  |

NACT, neoadjuvant chemotherapy; NET, neoadjuvant endocrine therapy; AJCC, American Joint Committee on Cancer; pCR, pathologic complete response; ref, reference group; yp, postneoadjuvant treatment pathologic stage; BCS, breast-conserving surgery; TM, total mastectomy; ALND, axillary lymph node dissection; SLNB, sentinel lymph node biopsy.

<sup>#</sup>*P* value was estimated using the chi-square test; <sup>†</sup>*P* value was estimated using analysis of variance.
